# Supplementary material for: Variability of OH reactivity in the Landes maritime Pine forest: Results from the LANDEX campaign 2017
Source: Copernicus journal article supplement (doi:10.5194/acp-2019-548), 2019-06-28
Supplement: Supplementary file [file acp-2019-548-AC1-supplement.pdf]

**Table 4.** Summary of the measured OH reactivity and the missing OH reactivity inside and above the canopy, during the day and the night, taking into account only PTR-MS data or all the data available at each height for OH reactivity calculations. These averages are calculated for the periods when CRM, PTR-MS and others instruments data are available.

|                      | Mean Measured OH reactivity (s <sup>-1</sup> ) | Mean missing OH reactivity with PTRQi-ToFMS (s <sup>-1</sup> ) | Missing ROH considering PTRQi-ToFMS data + other measurements (s <sup>-1</sup> ) |
|----------------------|------------------------------------------------|----------------------------------------------------------------|----------------------------------------------------------------------------------|
| <b>Inside</b>        | 19.0                                           | 7.3                                                            | 4.3                                                                              |
| Day                  | 18.4                                           | 7.0                                                            | 4.1                                                                              |
| Night                | 21.4                                           | 9.0                                                            | 5.6                                                                              |
| Stable cool nights   | 20.5                                           | 5.7                                                            | 2.1                                                                              |
| Stable warm nights   | 41.6                                           | 10.9                                                           | 6.9                                                                              |
| Unstable cool nights | 7.9                                            | 4.5                                                            | <LOD                                                                             |
| Unstable warm nights | 13.5                                           | 6.8                                                            | 3.6                                                                              |
| <b>Above</b>         | 12.6                                           | 6.0                                                            | 4.2                                                                              |
| Day                  | 10.4                                           | 5.0                                                            | 3.1                                                                              |
| Night                | 15.5                                           | 7.5                                                            | 5.6                                                                              |
| Stable cool nights   | 14.8                                           | 7.5                                                            | 5.7                                                                              |
| Stable warm nights   | -----                                          | -----                                                          | -----                                                                            |
| Unstable warm nights | 20.5                                           | 7.1                                                            | 5.2                                                                              |
| Unstable cool nights | -----                                          | -----                                                          | -----                                                                            |

**Table S9: Summary of day/ night mean values of measured OH reactivity, the calculated one from PTR-MS data and from all available measurements, as well as the resulting missing OH reactivity, inside and above the canopy.**

|                               | Day/ Night       | Measured ROH/ LSCE- CRM (s <sup>-1</sup> ) | Calculated ROH PTRQi-ToFMS (s <sup>-1</sup> ) | Calculated ROH PTRQi-ToFMS + other measurements (s <sup>-1</sup> ) | Missing ROH considering PTRQi-ToFMS (s <sup>-1</sup> ) | Missing ROH considering PTRQi-ToFMS + other measurements (s <sup>-1</sup> ) | Mean Temperature (°C) | Mean u* (m/s) | Day/ Night state       |              |
|-------------------------------|------------------|--------------------------------------------|-----------------------------------------------|--------------------------------------------------------------------|--------------------------------------------------------|-----------------------------------------------------------------------------|-----------------------|---------------|------------------------|--------------|
| Inside canopy                 | 3rd, July        | 14.5                                       | 5.3                                           | 7.8                                                                | 9.2                                                    | 6.8                                                                         | 22.9                  | 0.4           | Cool                   |              |
|                               | 3rd- 4th, July   | 25.7                                       | 16.1                                          | 20.1                                                               | 9.6                                                    | 5.6                                                                         | 15.6                  | 0.1           | Stable/ Cool           |              |
|                               | 4th, July        | 20.0                                       | 9.9                                           | 12.2                                                               | 10.1                                                   | 7.7                                                                         | 26.5                  | 0.6           | Warm                   |              |
|                               | 4th- 5th, July   | 45.7                                       | 28.2                                          | 32.6                                                               | 17.5                                                   | 13.1                                                                        | 21.7                  | 0.2           | Stable/ Warm           |              |
|                               | 5th, July        | 16.7                                       | 8.1                                           | 10.8                                                               | 8.7                                                    | 6.1                                                                         | 28.1                  | 0.4           | Warm                   |              |
|                               | 5th- 6th, July   | 12.6                                       | 4.8                                           | 8.4                                                                | 7.8                                                    | 4.2                                                                         | 18.9                  | 0.3           | Unstable/ Stable/ Warm |              |
|                               | 6th, July        | 22.1                                       | 11.0                                          | 13.9                                                               | 11.1                                                   | 8.2                                                                         | 24.2                  | 0.4           | Warm                   |              |
|                               | 6th- 7th, July   | 37.5                                       | 33.2                                          | 36.9                                                               | 4.4                                                    | < LOD                                                                       | 20.1                  | 0.1           | Stable/ Warm           |              |
|                               | 7th, July        | 28.1                                       | 18.5                                          | 21.6                                                               | 10.0                                                   | 6.5                                                                         | 28.3                  | 0.4           | Warm                   |              |
|                               | 7th- 8th, July   | 17.9                                       | 9.6                                           | 13.1                                                               | 8.7                                                    | 4.8                                                                         | 21.2                  | 0.4           | Unstable/ Warm         |              |
|                               | 8th, July        | 13.2                                       | 7.5                                           | 10.3                                                               | 5.7                                                    | 2.9                                                                         | 23.0                  | 0.5           | Cool                   |              |
|                               | 8th- 9th, July   | 7.3                                        | 2.5                                           | 5.3                                                                | 4.7                                                    | < LOD                                                                       | 19.5                  | 0.5           | Unstable/ Warm         |              |
| Above canopy                  | 9th, July        | 7.4                                        | 3.0                                           | 5.3                                                                | 4.4                                                    | < LOD                                                                       | 20.9                  | 0.8           | Cool                   |              |
|                               | 9th -10th, July  | 7.9                                        | 3.4                                           | 7.1                                                                | 4.5                                                    | < LOD                                                                       | 18.2                  | 0.3           | Unstable/ Stable/ Cool |              |
|                               | 10th, July       | 7.7                                        | 2.6                                           | 4.3                                                                | 5.1                                                    | 3.4                                                                         | 20.6                  | 0.5           | Cool                   |              |
|                               | 10th-11th, July  | 13.0                                       | 5.1                                           | 6.9                                                                | 8.0                                                    | 6.1                                                                         | 17.3                  | 0.1           | Stable/ Cool           |              |
|                               | 11th, July       | 9.5                                        | 3.4                                           | 5.2                                                                | 6.1                                                    | 4.3                                                                         | 20.9                  | 0.4           | Cool                   |              |
|                               | 11th- 12th, July | 15.8                                       | 6.1                                           | 7.9                                                                | 9.7                                                    | 7.9                                                                         | 17.0                  | 0.1           | Stable/ Cool           |              |
|                               | 12th, July       | 10.9                                       | 3.0                                           | 4.7                                                                | 7.9                                                    | 6.2                                                                         | 20.5                  | 0.7           | Cool                   |              |
|                               | 12th- 13th, July |                                            |                                               |                                                                    |                                                        |                                                                             | 18.0                  | 0.1           | Stable/ Cool           |              |
|                               | Inside canopy    | 13th July                                  | 6.7                                           | 3.1                                                                | 6.3                                                    | 3.6                                                                         | <LOD                  | 20.1          | 0.4                    | Cool         |
|                               |                  | 13th- 14th, July                           | 18.7                                          | 15.3                                                               | 19.1                                                   | 3.4                                                                         | <LOD                  | 18.0          | 0.1                    | Stable/ Cool |
| 14th, July                    |                  | 8.9                                        | 6.7                                           | 9.1                                                                | < LOD                                                  | <LOD                                                                        | 21.2                  | 0.5           | Cool                   |              |
| 14th- 15th, July              |                  | 17.1                                       | 12.9                                          | 16.0                                                               | 4.2                                                    | <LOD                                                                        | 15.2                  | 0.1           | Stable/ Cool           |              |
| 15th, July a.m                |                  | 13.3                                       | 12.6                                          | 15.6                                                               | < LOD                                                  | <LOD                                                                        | 22.0                  | 0.4           | Cool                   |              |
| 15th, July p.m                | 7.0              | 4.2                                        | 5.9                                           | 2.9                                                                | <LOD                                                   |                                                                             |                       |               |                        |              |
| Above canopy                  | 15th- 16th, July | 15.6                                       | 10.8                                          | 12.7                                                               | 4.8                                                    | 2.9                                                                         | 16.6                  | 0.1           | Stable/ Cool           |              |
|                               | 16th, July       | 10.0                                       | 8.1                                           | 9.9                                                                | <LOD                                                   | <LOD                                                                        | 26.7                  | 0.5           | Warm                   |              |
|                               | 16th- 17th, July |                                            |                                               |                                                                    |                                                        |                                                                             | 21.6                  | 0.1           | Stable/ Warm           |              |
| 1h Inside/<br>1h Above canopy | 17th, July       | 41.5/ 39.8*                                | 23.3/ 23.0*                                   | 26.8/ 25.0*                                                        | 18.2/ 16.8*                                            | 14.7/ 14.8*                                                                 | 28.9                  | 0.4           | Warm                   |              |
|                               | 17th-18th, July  | 20.5/ 20.5*                                | 15.3/ 13.4*                                   | 18.4/ 15.3*                                                        | 5.2/ 7.2*                                              | ≈ LOD/ 5.2*                                                                 | 23.2                  | 0.3           | Unstable/ Stable/ Warm |              |
|                               | 18th, July       | 11.5/ 8.4*                                 | 7.9/ 6.4*                                     | 10.3/ 8.1*                                                         | 3.6/ < LOD*                                            | <LOD/ < LOD*                                                                | 30.3                  | 0.5           | Warm                   |              |
