# Supplementary material for: Variability of OH reactivity in the Landes maritime Pine forest: Results from the LANDEX campaign 2017
Source: Copernicus journal article supplement (doi:10.5194/acp-2019-548), 2019-06-28
Supplement: Supplementary file [file acp-2019-548-AC3-supplement.pdf]

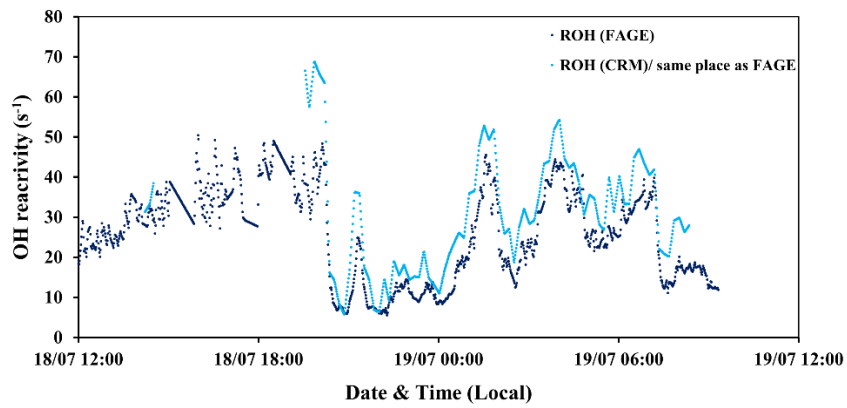

**Figure 1.** Time series of total OH reactivity measured by UL-FAGE (dark blue) and LSCE-CRM (light blue) instruments from the 18<sup>th</sup> to 19<sup>th</sup> of July 2017, at the same location inside canopy.

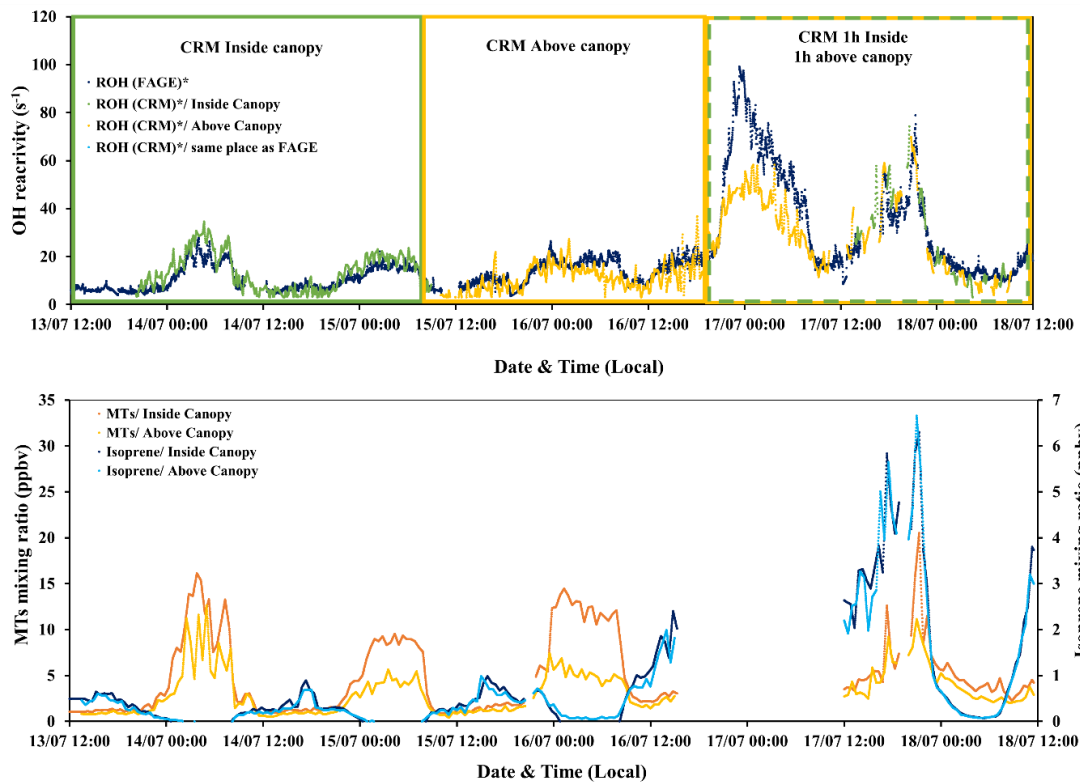

**Figure 4.** (a) Time series of total OH reactivity measured by UL-FAGE and LSCE-CRM instruments from the 13<sup>th</sup> to 18<sup>th</sup> of July 2017 (upper graph). Dark blue symbols represent the measured reactivity by UL-FAGE, green, yellow and blue symbols represent the measured reactivity by LSCE-CRM inside canopy, above canopy and inside canopy at the same location as the UL-FAGE instrument, respectively. The lower graph (b) shows the sum of monoterpenes (MTs) and isoprene measured with the PTR-MS, in the field for the same period. Dark blue and light blue dots correspond to isoprene concentrations at 6 and 12 m height, respectively. Orange and yellow dots represent monoterpenes concentrations at 6 and 12 m height, respectively.
